# Supplementary material for: Towards highly selective ethylene epoxidation catalysts using hydrogen peroxide and tungsten- or niobium-incorporated mesoporous silicate (KIT-6)
Source: Royal Society of Chemistry journal article supplement (doi:10.1039/c4cy00877d), 2014-01-01
Supplement: c4cy00877d1.pdf [file c4cy00877d1.pdf]

## Supplementary Materials

### Liquid Phase Ethylene Epoxidation Over W-KIT-6 and Nb-KIT-6 Catalysts Using Hydrogen Peroxide as Oxidant

Wenjuan Yan<sup>1,2</sup>, Anand Ramanathan<sup>1</sup>, Madhav Ghanta,<sup>1,2,3</sup> Bala Subramaniam<sup>1, 2\*</sup>

<sup>1</sup>Center for Environmentally Beneficial Catalysis, Lawrence, Kansas 66047.

<sup>2</sup> Department of Chemical and Petroleum Engineering, University of Kansas, Lawrence, KS  
66045

<sup>3</sup>Currently with SABIC Innovative Plastics, Selkirk, NY 12158.

\*To whom correspondence should be addressed. E-mail: [bsubramaniam@ku.edu](mailto:bsubramaniam@ku.edu); Phone: 785-  
864-2903; Fax: 785-884-6051

### Gas-liquid mass transfer limitations

At 50 bar and 35 °C, the volumetric mass transfer coefficient ( $k_l a$ ) is estimated to be 0.0082 s<sup>-1</sup> at a stirring rate of 1400 rpm.<sup>1</sup> The maximum concentration of H<sub>2</sub>O<sub>2</sub> ( $C_{H_2O_2}$ ) is taken as 3.56 mol/L.  $R_{EO}$  was estimated based on the EO formation rate as shown in Figure 1 ( $5.4 \times 10^{-6}$  mol/L/s). The calculate value of  $\alpha_1$  is 1.83 ( $10^{-4}$ ), which is significantly less than the empirical criterion for the elimination of mass transfer limitations shown in Eq. 1.

$$\alpha_1 = \frac{R_{EO}}{k_l a C_{H_2O_2}} < 0.1 \quad \text{Eq. 1}$$

### Liquid-solid mass transfer limitations

The Wilke-Chang equation was used to estimate the diffusion coefficient of ethylene in MeOH, the dominant solvent in the reaction mixture.

$$D_{E-M} = \frac{7.4 \times 10^{-8} (\phi_M M_M)^{1/2} T}{\eta_M V_E^{0.6}} \quad \text{Eq. 2}$$

$\phi = 1.9$  for MeOH as solvent

The dimensionless groups (Schmidt number, Reynolds number, and Sherwood number) needed to calculate the mass transfer coefficient are estimated according to the following equations:

$$Sc = \frac{\nu_M}{D_{E-M}} \quad \text{Eq. 3}$$

$$Re = \frac{N d_{st}}{D_{E-M}} \quad \text{Eq. 4}$$

$$Sh = 2 + 0.6Re^{1/2}Sc^{1/3} \quad \text{Eq.5}$$

$$Sh = \frac{k_s d_p}{D_{E-M}} \quad \text{Eq.6}$$

$$\alpha_2 = \frac{R_{EO}}{k_s a_p C_{H_2O_2}} = 3.0 \times 10^{-13} \quad \text{Eq.7}$$

The values of the various parameters are summarized in Table S1. Since  $\alpha_2 \ll 0.1$ , it is concluded that liquid-solid mass transfer limitations are insignificant.

**Table S1.** Summary of physical and transport properties for assessment of liquid-solid mass-transfer limitations

| Parameter    | description                                     | values                | units               |
|--------------|-------------------------------------------------|-----------------------|---------------------|
| $k_a$        | Volumetric mass transfer coefficient            | 0.0082                | $s^{-1}$            |
| $C_{H_2O_2}$ | Initial liquid phase concentration of $H_2O_2$  | 3.56                  | $mol L^{-1}$        |
| $R_{EO}$     | Rate of reaction                                | $5.4 \times 10^{-6}$  | $mol L^{-1} s^{-1}$ |
| $\alpha_1$   | Gas-liquid mass transfer resistance parameter   | $1.83 \times 10^{-4}$ | --                  |
| $D_{E-M}$    | Diffusion coefficient                           | $1.8 \times 10^{-5}$  | $cm^2 s^{-1}$       |
| Sc           | Schmidt number                                  | 352                   | --                  |
| Re           | Reynolds number                                 | 56452                 | --                  |
| Sh           | Sherwood number                                 | 1009                  | --                  |
| $k_s$        | Mass-transfer coefficient                       | 888                   | $cm s^{-1}$         |
| $\alpha_2$   | Liquid-solid mass transfer resistance parameter | $3.0 \times 10^{-13}$ | --                  |

## Intraparticle mass transfer limitations

The extent of intraparticle mass transfer limitations is assessed by estimating the value of the Thiele Modulus. It is assumed that the epoxidation follows pseudo-first order kinetics (since initially, H<sub>2</sub>O<sub>2</sub> is present in excess). Using the catalyst and transport properties listed in Table S2, the Thiele modulus is estimated according to Eq. 8.

$$\phi_{exp} = \frac{d_p}{6} \left[ \frac{(n+1)\rho_p R_{EO}}{2D_e w C_{H_2O_2}} \right]^{1/2} = 0.001 < 0.2 \quad \text{Eq. 8}$$

The estimated value of the Thiele modulus clearly suggests that intraparticle mass transfer limitations are insignificant at the investigated conditions.

**Table S2.** Summary of physical and transport properties required for assessment of intraparticle mass-transfer limitations

| Parameter     | Description              | Value                | Units        |
|---------------|--------------------------|----------------------|--------------|
| $\varepsilon$ | Catalyst porosity        | 0.4                  | --           |
| $\tau$        | Tortuosity               | 3                    | --           |
| $D_e$         | Effective diffusivity    | $2.3 \cdot 10^{-10}$ | $m^2 s^{-1}$ |
| $w$           | Catalyst loading density | 0.015                | $kg m^{-3}$  |
| $\phi_{exp}$  | Thiele parameter         | 0.0011               | --           |

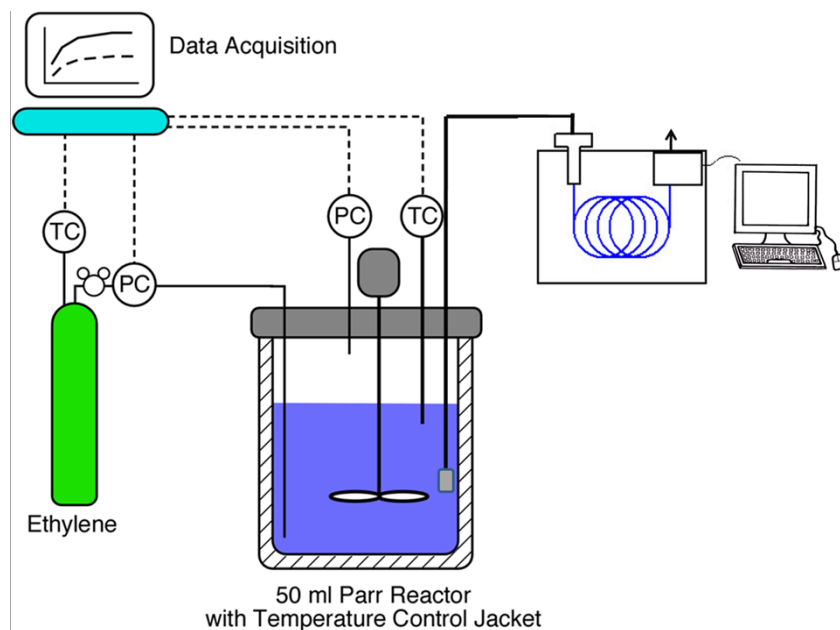

**Figure S1.** Schematic of experimental unit.<sup>1</sup>

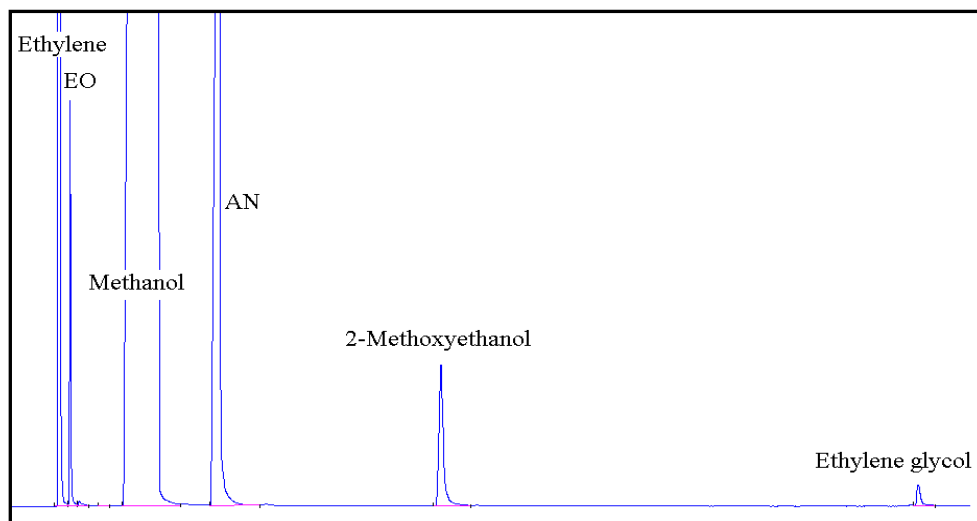

**Figure S2.** Sample GC/FID chromatogram of ethylene epoxidation reaction mixture showing various detected products.<sup>1</sup>

## References

1. M. Ghanta, B. Subramaniam, H. J. Lee, and D. H. Busch, *AIChE J.*, 2013, **59**, 180–187.
